# Supplementary material for: Functional and structural segregation of overlapping helices in HIV-1
Source: eLife journal article supplement (doi:10.7554/elife.72482), 2022-05-05

Figure 6A

gp160  
gp120

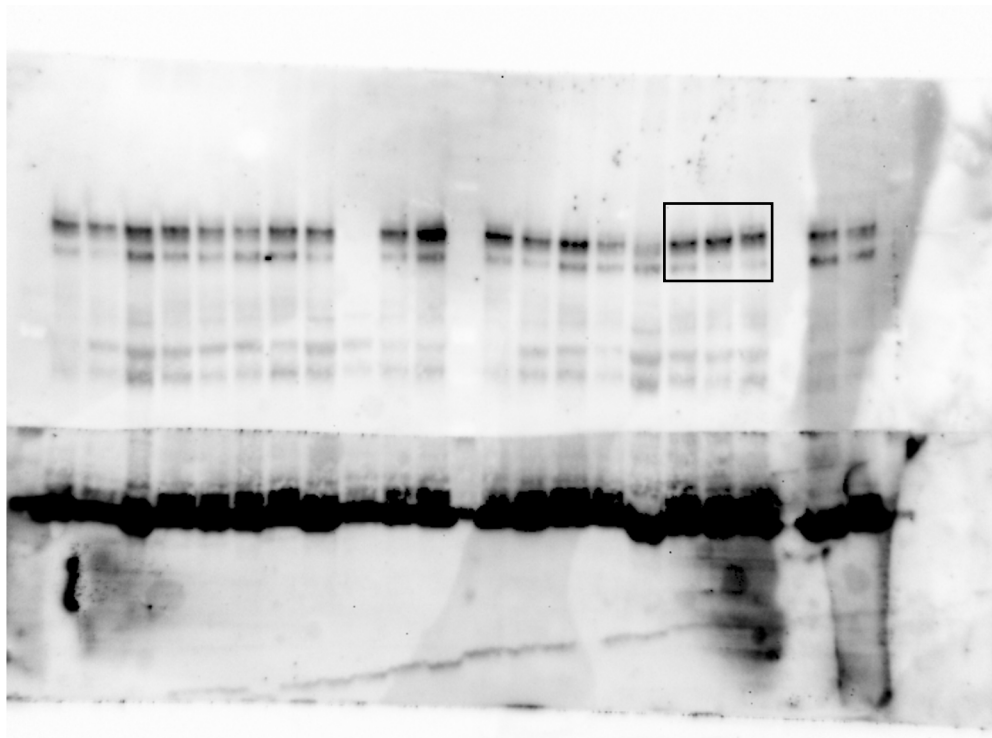

p24

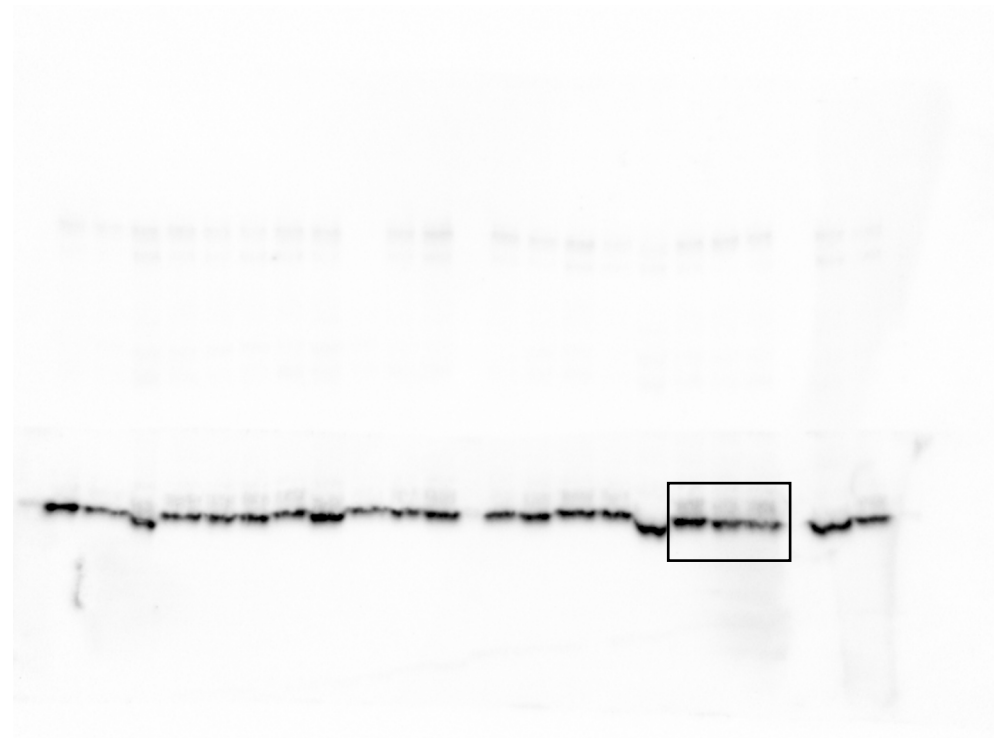

Figure 6B

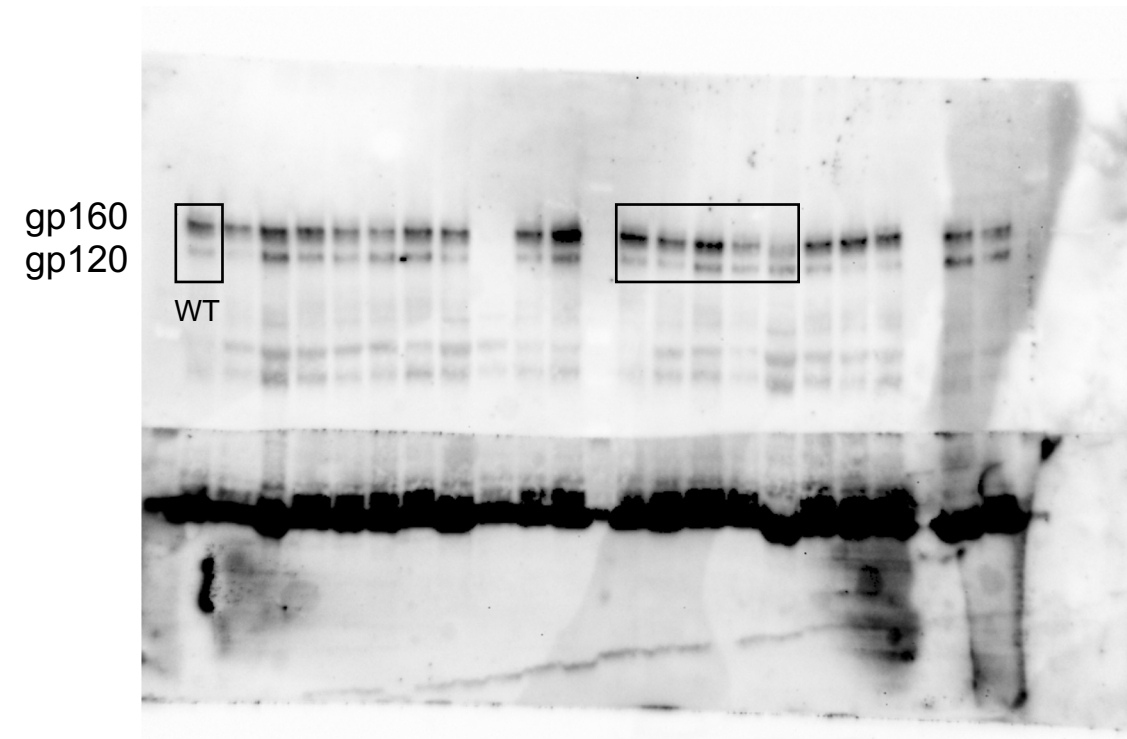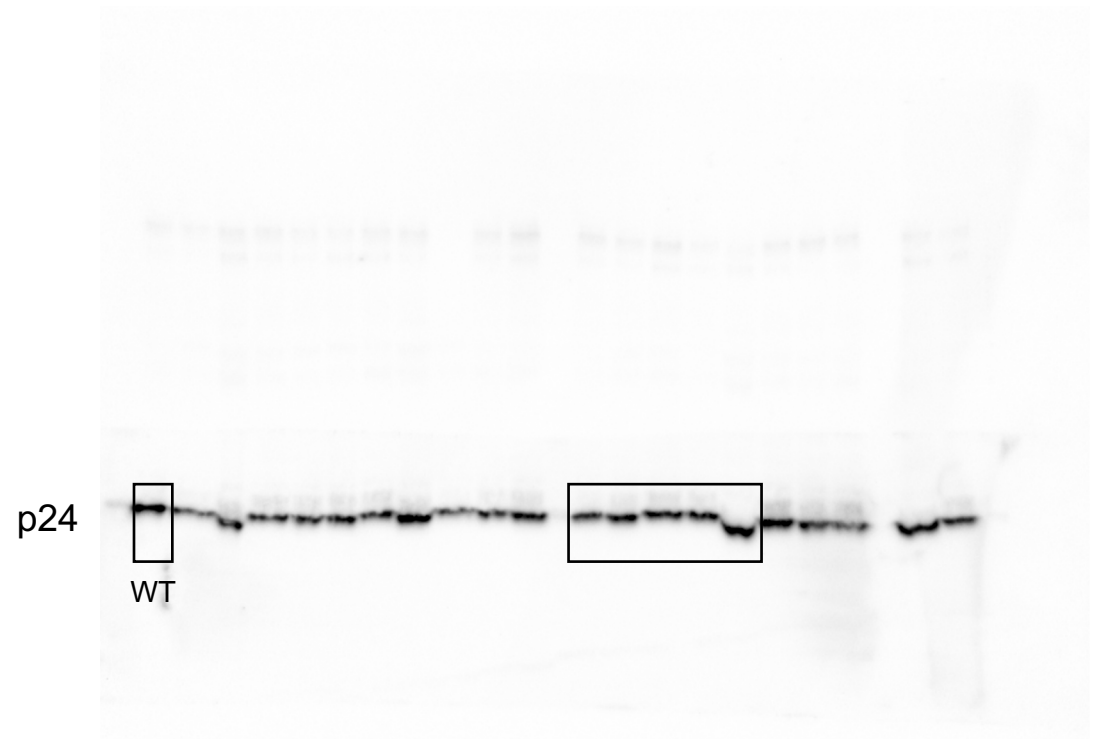

Supplement: supp [file elife-72482-supp-v1.zip]
